# Supplementary material
Source: Elsevier journal article supplement (https://www.sciencedirect.com/science/article/pii/S0212656721001785)
Supplement: mmc1 [file S0212656721001785:mmc1.docx]

Appendices

Search strategy

## 1 Medline search strategy

### Database: Ovid MEDLINE Completo - Epub Ahead of Print, In-Process & Other Non-Indexed Citations, Ovid MEDLINE(R) Daily and Ovid MEDLINE(R)

### Search Strategy:

--------------------------------------------------------------------------------

1 sciatic*.ti,ab,tw. (26477)

2 ((Lesion* or disease* or neuralgia* or neuriti* or nerve palsi* or nerve) adj2 sciatic*).mp. [mp=title, abstract, original title, name of substance word, subject heading word, floating sub-heading word, keyword heading word, protocol supplementary concept word, rare disease supplementary concept word, unique identifier, synonyms] (26265)

3 1 or 2 (32592)

4 exp SCIATIC NEUROPATHY/ or exp SCIATIC NERVE/ (35372)

5 3 or 4 (45327)

6 gabap*.mp. [mp=title, abstract, original title, name of substance word, subject heading word, floating sub-heading word, keyword heading word, protocol supplementary concept word, rare disease supplementary concept word, unique identifier, synonyms] (6313)

7 pregab*.mp. or exp PREGABALIN/ (3086)

8 6 or 7 (8371)

9 5 and 8 (260)

10 limit 9 to ("reviews (maximizes sensitivity)" or "therapy (maximizes sensitivity)") (194)

***************************

## 2 EMBASE search startegy

### Database: Embase <1974 to 2018 July 25>

### Search Strategy:

--------------------------------------------------------------------------------

1 sciatic*.ti,ab,tw. (32051)

2 ((Lesion* or disease* or neuralgia* or neuriti* or nerve palsi* or nerve) adj2 sciatic*).mp. [mp=title, abstract, heading word, drug trade name, original title, device manufacturer, drug manufacturer, device trade name, keyword, floating subheading word, candidate term word] (30494)

3 1 or 2 (37654)

4 exp sciatic neuropathy/ or exp sciatic nerve/ (25484)

5 3 or 4 (37810)

6 exp gabapentin/ (27202)

7 exp pregabalin/ (11891)

8 gabap*.mp. (28222)

9 pregab*.mp. (12271)

10 6 or 7 or 8 or 9 (34191)

11 5 and 10 (512)

12 limit 11 to ("reviews (maximizes sensitivity)" or "therapy (maximizes sensitivity)") (157)

***************************

## 3 Cochrane Strategy

### COCHRANE LIBRARY [última consulta: 26-07-2018]

ID Search

#1 MeSH descriptor: [Sciatic Nerve] explode all trees 572

#2 MeSH descriptor: [Sciatic Neuropathy] explode all trees 328

#3 gabapentin* 2003

#4 pregabalin* 1546

#5 sciatic* 1645

#6 #1 or #2 or #5 1963

#7 #3 or #4 3164

#8 #6 and #7 40

## 4 Clinicaltrials.gov search strategy

Pregabalin OR Gabapentin | Neuropathic Pain OR Sciatica OR low back pain | Adult, Older Adult

# 1 Pregabalin OR Gabapentin: 796

# 2 Neuropathic Pain OR Sciatica OR low back pain: 2838

# 1 AND # 2: 120

# 1 Pregabalin OR Gabapentin: 796

# 2 Sciatica OR low back pain: 1335

# 1 AND # 2: 10
